# Supplementary material for: Chemically reversible binding of H2S to a zinc porphyrin complex: towards implementation of a reversible sensor via a “coordinative-based approach”
Source: Royal Society of Chemistry journal article supplement (doi:10.1039/c6dt04753j), 2017-01-01
Supplement: c6dt04753j1.pdf [file c6dt04753j1.pdf]

Supporting Information

## Chemically reversible binding of H<sub>2</sub>S to a zinc porphyrin complex: towards implementation of a reversible sensor via a “coordinative-based approach”.

Maria Strianese<sup>a\*</sup>, Marina Lamberti<sup>b</sup>, Claudio Pellecchia<sup>a\*</sup>

<sup>a</sup>Dipartimento di Chimica e Biologia “Adolfo Zambelli”, <sup>b</sup>Dipartimento di Fisica “E. Caianiello”  
Università degli Studi di Salerno Via Giovanni Paolo II, 132 84084 Fisciano (SA) Italy

\*Corresponding author. E-mail: mstriane@unisa.it

\*Corresponding author. E-mail: cpellecchia@unisa.it

### Contents:

|                                                                                                                  |    |
|------------------------------------------------------------------------------------------------------------------|----|
| Figure S1, HR MALDI-FT-ICR spectrum of <i>TMPyPZn</i>                                                            | 2  |
| Figure S2, <sup>1</sup> H NMR spectrum of <i>TMPyPZn</i> in DMSO-d <sub>6</sub>                                  | 3  |
| Figure S3, <sup>13</sup> C NMR spectrum of <i>TMPyPZn</i> in DMSO-d <sub>6</sub>                                 | 4  |
| Figure S4, <sup>1</sup> H NMR spectrum of <i>TMPyPZn</i> in D <sub>2</sub> O                                     | 5  |
| Figure S5, <sup>13</sup> C NMR spectrum of <i>TMPyPZn</i> in D <sub>2</sub> O                                    | 6  |
| Figure S6, Electronic absorption spectra of <i>TMPyPZn</i> and <i>TMPyP</i>                                      | 7  |
| Figure S7, Fluorescence emission spectra of <i>TMPyPZn</i> and <i>TMPyP</i>                                      | 8  |
| Figure S8, Fluorescence emission spectra of <i>TMPyPZn</i> at different $\lambda_{exc}$                          | 9  |
| Figure S9, <sup>1</sup> H NMR spectra of <i>TMPyP</i> in D <sub>2</sub> O free and upon HS <sup>-</sup> addition | 10 |
| Figure S10, Fluorescence NaSH titration of <i>TMPyPZn</i>                                                        | 11 |
| Figure S11, Fluorescence titration of <i>TMPyPZn</i> with H <sub>2</sub> S                                       | 12 |
| Figure S12, HR MALDI-FT-ICR spectrum of <i>TMPyPZn</i> upon HS <sup>-</sup> addition                             | 13 |

Generic Display Report (all)

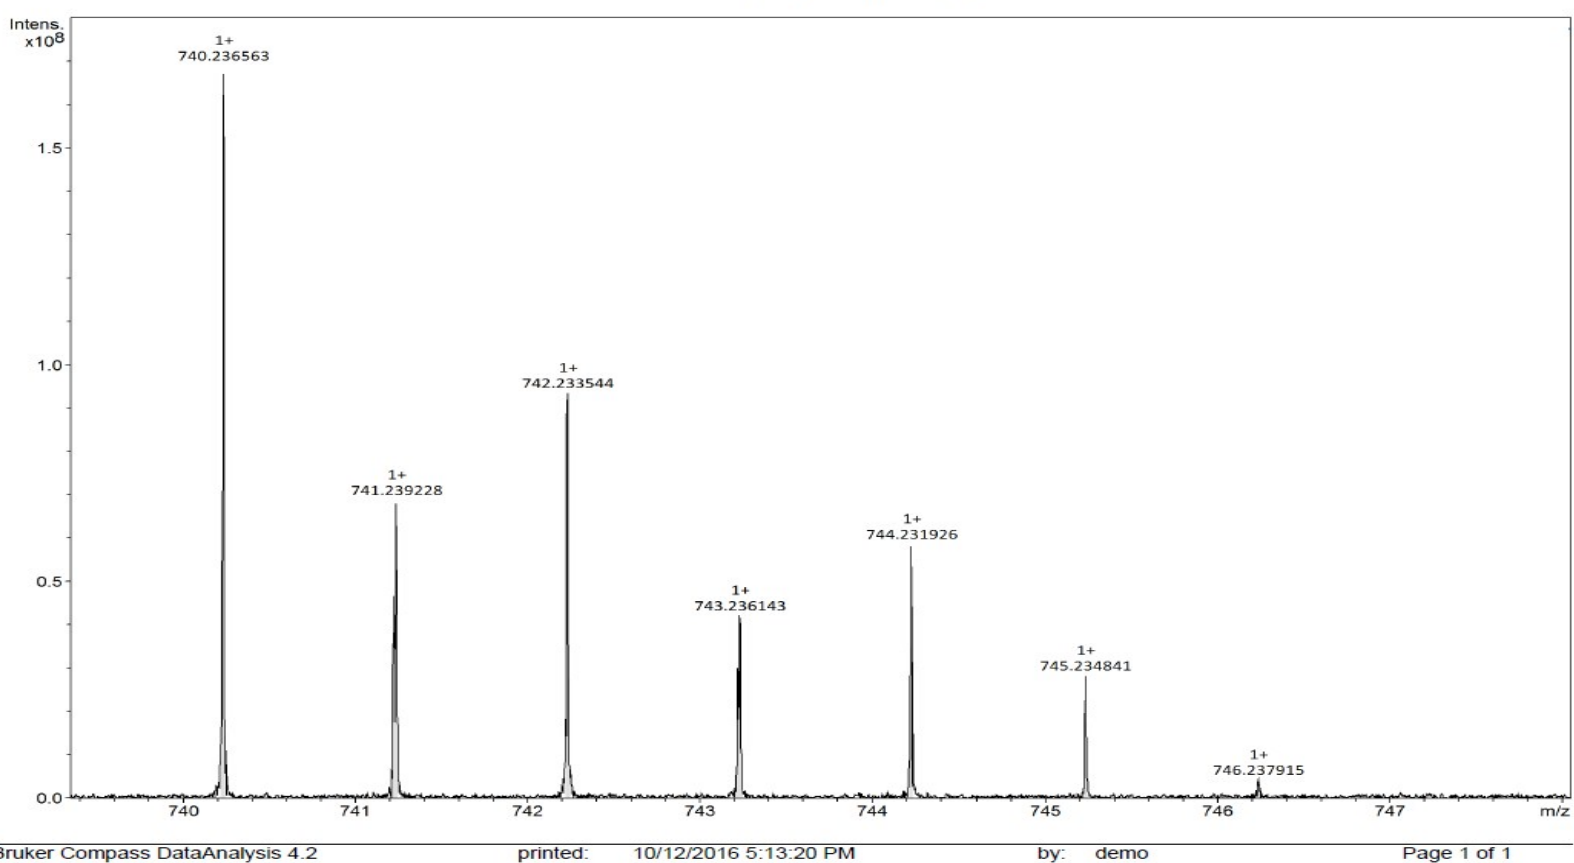

**Figure S1.** HR MALDI-FT-ICR spectrum of *TMPyPZn* in water solution (ionizing the sample in the positive ion mode)

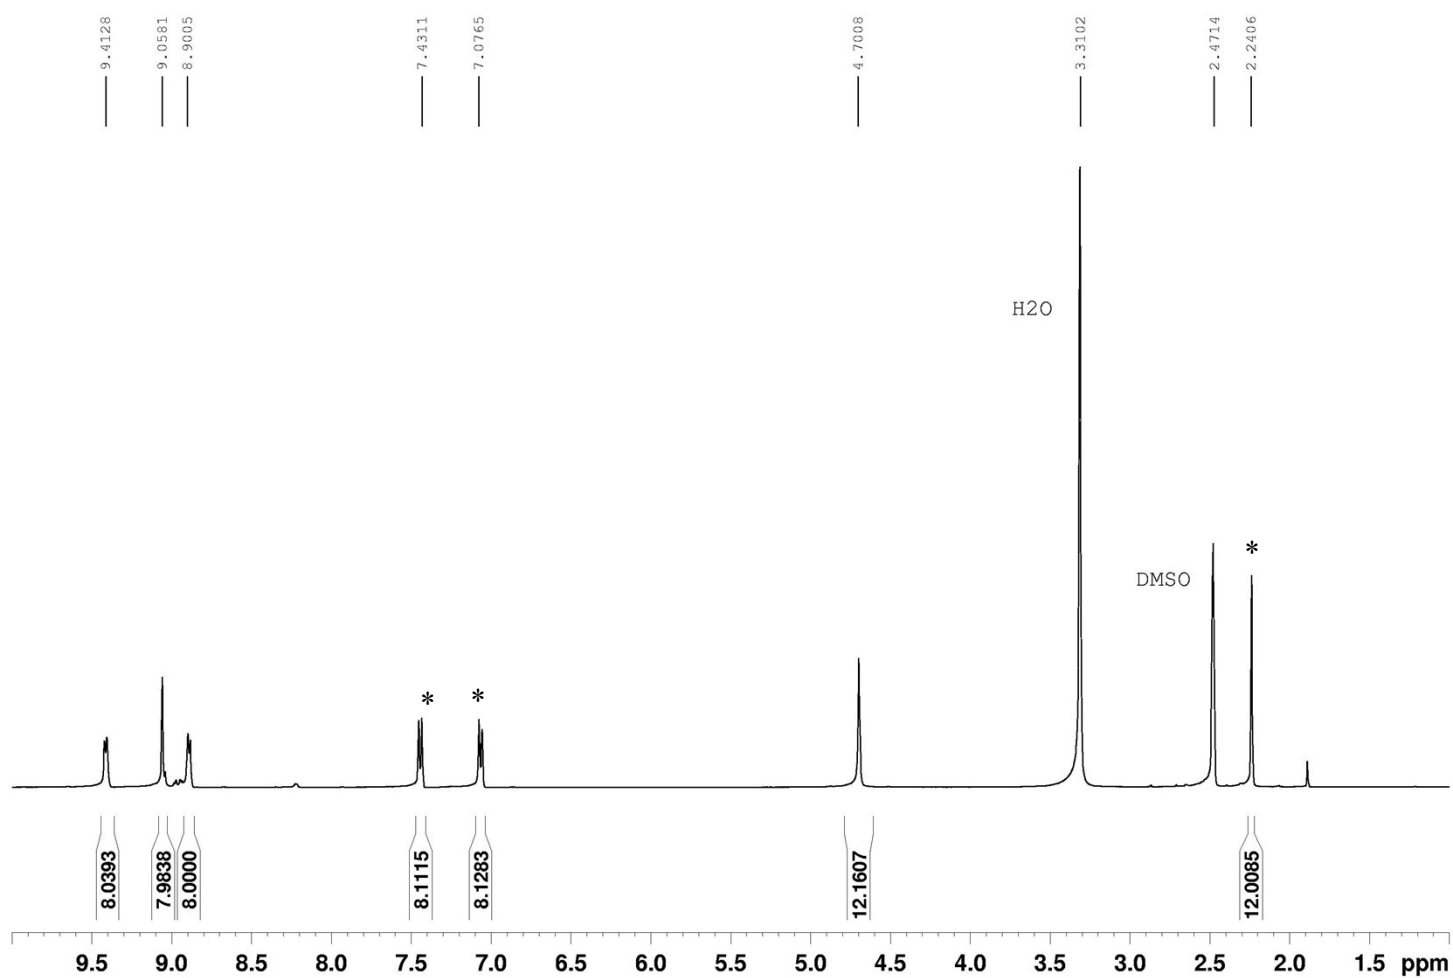

**Figure S2.** <sup>1</sup>H NMR spectrum of *TMPyPZn* in DMSO-*d*<sub>6</sub> (rt, 400.13 MHz). Peaks denoted with a (\*) correspond to the toluenesulfonate counterion.

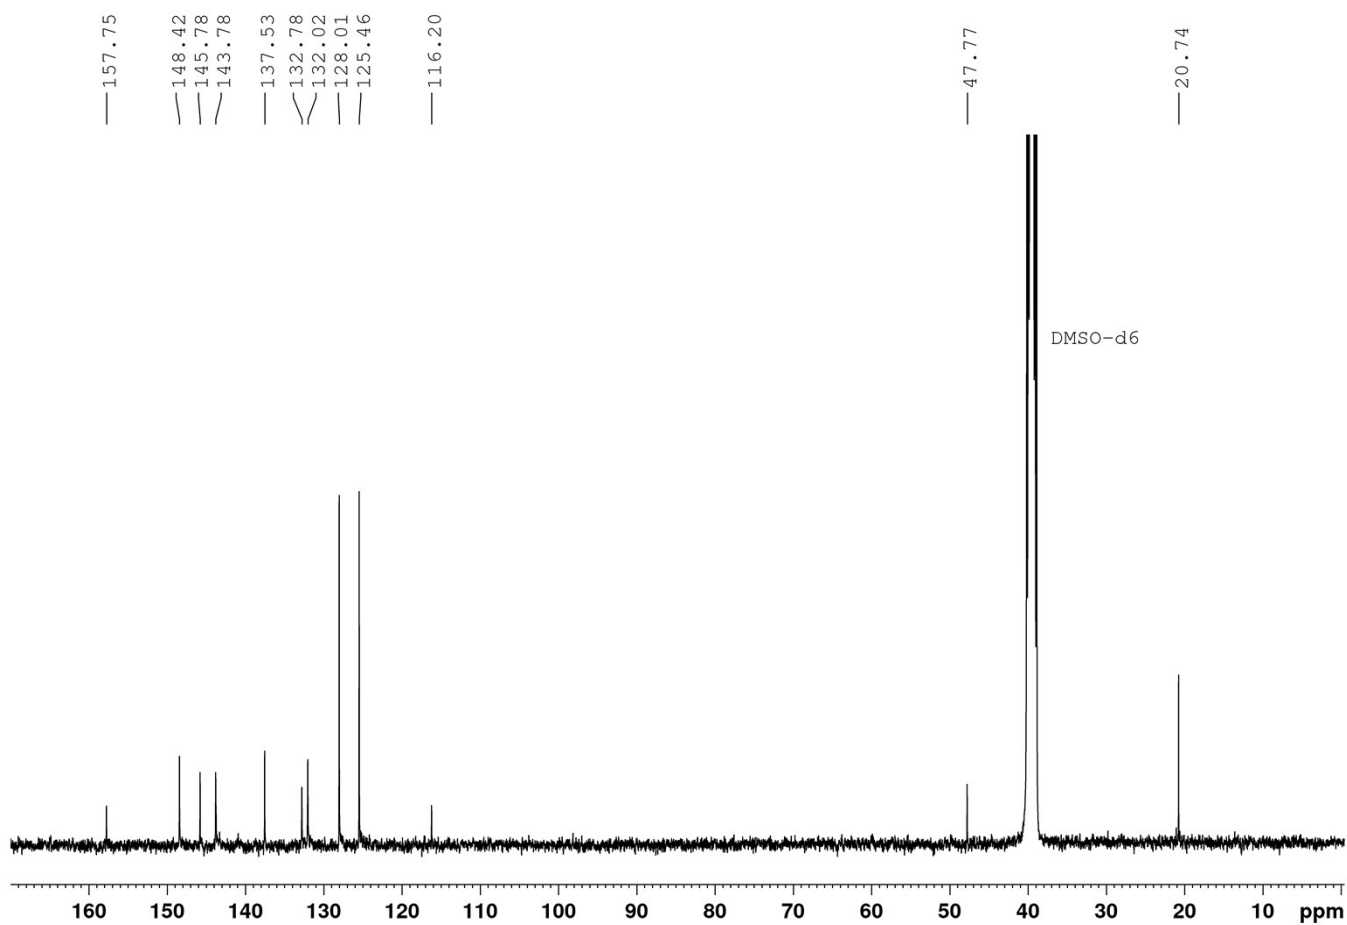

**Figure S3.**  $^{13}\text{C}$  NMR spectrum of *TMPyPZn* in  $\text{DMSO-}d_6$  (rt, 400.13 MHz)

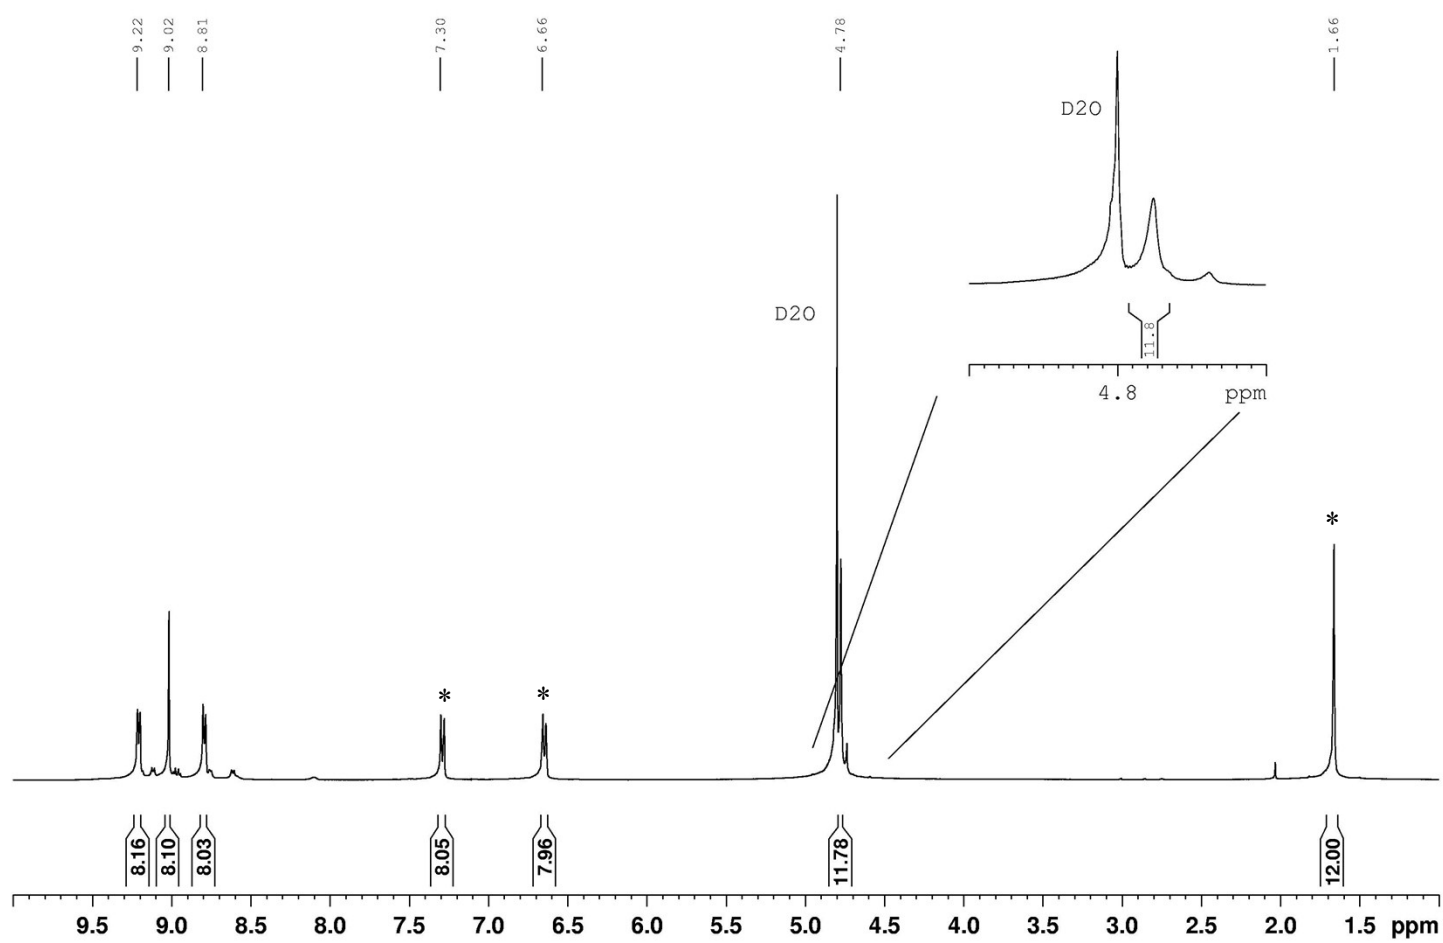

**Figure S4.**  $^1\text{H}$  NMR spectrum of *TMPyPZn* in  $\text{D}_2\text{O}$  (rt, 400.13 MHz). Peaks denoted with a (\*) correspond to the toluenesulfonate counterion.

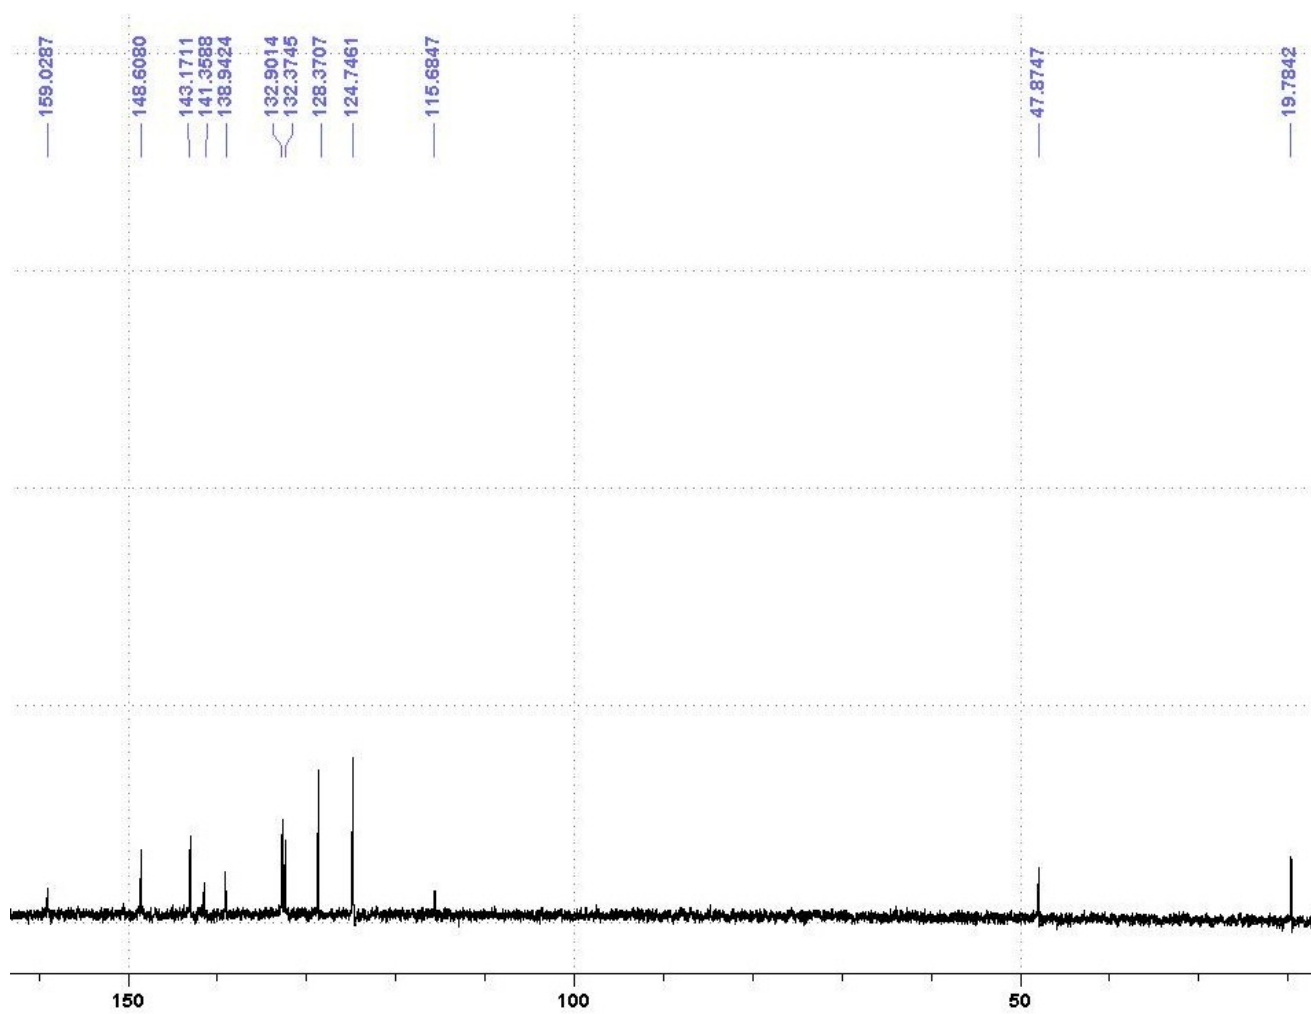

Figure S5.  $^{13}\text{C}$  NMR spectrum of *TMPyPZn* in  $\text{D}_2\text{O}$  (rt, 400.13 MHz)

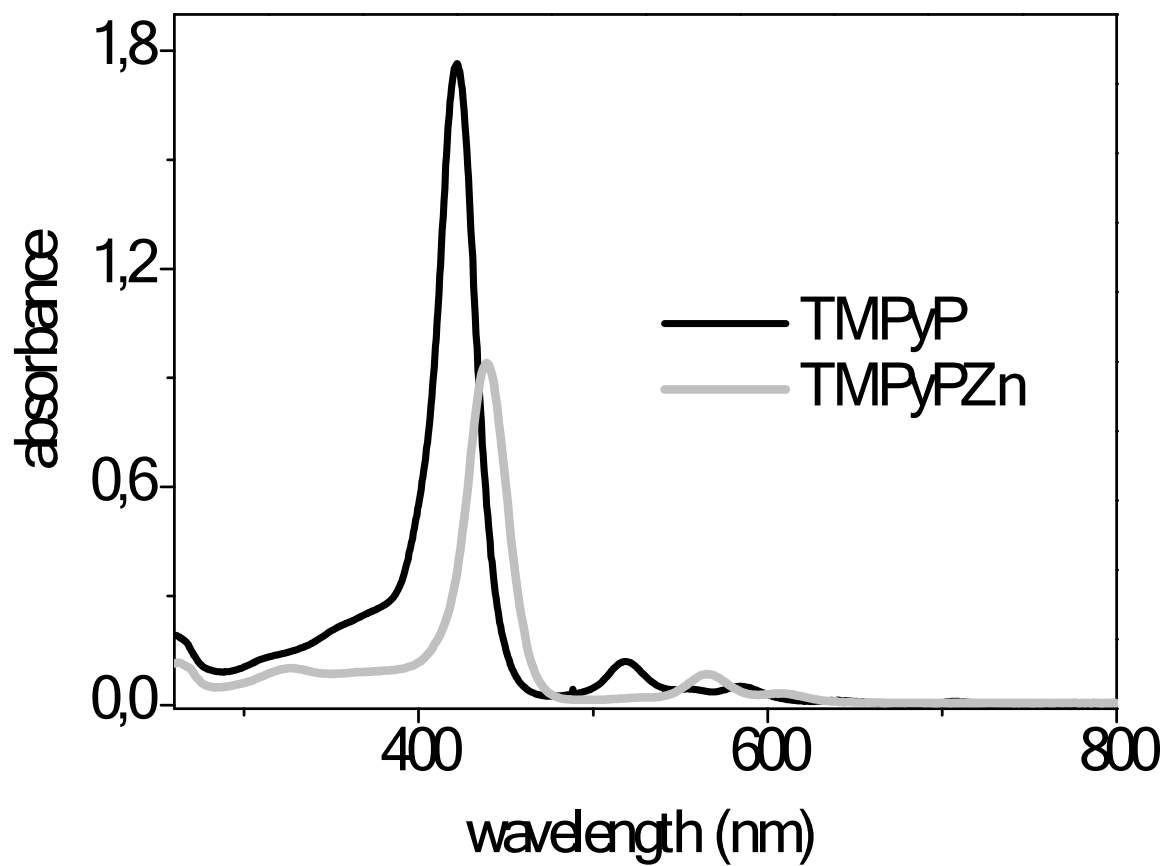

**Figure S6.** Electronic absorption spectra of TMPyP and *TMPyPZn* (rt, hepes 25 mM, pH 7.4). [TMPyP] = 5  $\mu$ M [TMPyPZn] = 5  $\mu$ M.

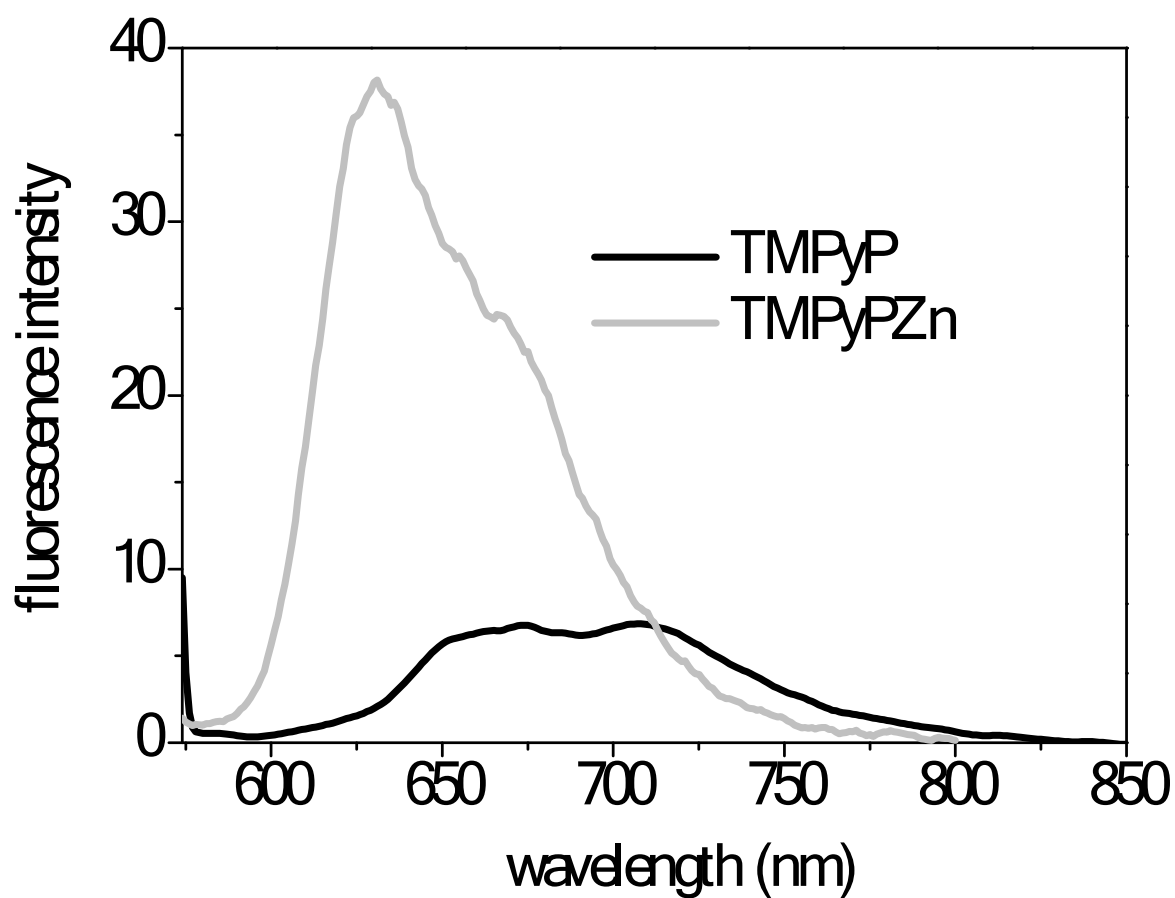

**Figure S7.** Fluorescence spectra of *TMPyP* and *TMPyPZn* (rt, hepes buffer 25mM, pH 7.4) upon excitation at 563 nm. [TMPyP] = 5 $\mu$ M [TMPyPZn] = 5 $\mu$ M.



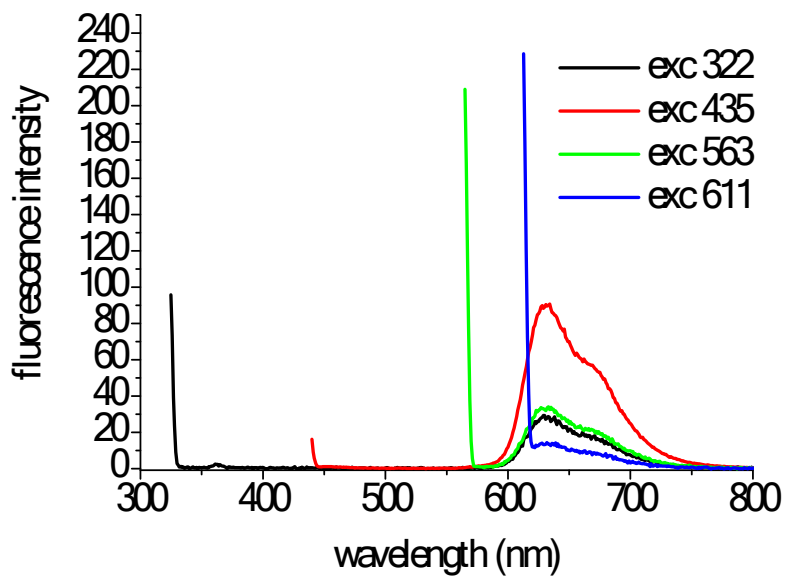

**Figure S8.** Fluorescence spectra of *TMPyPZn* (rt, hepes buffer 25 mM, pH 7.4) upon excitation at 322, 435, 563 and 611 nm. [TMPyPZn] = 5  $\mu$ M.

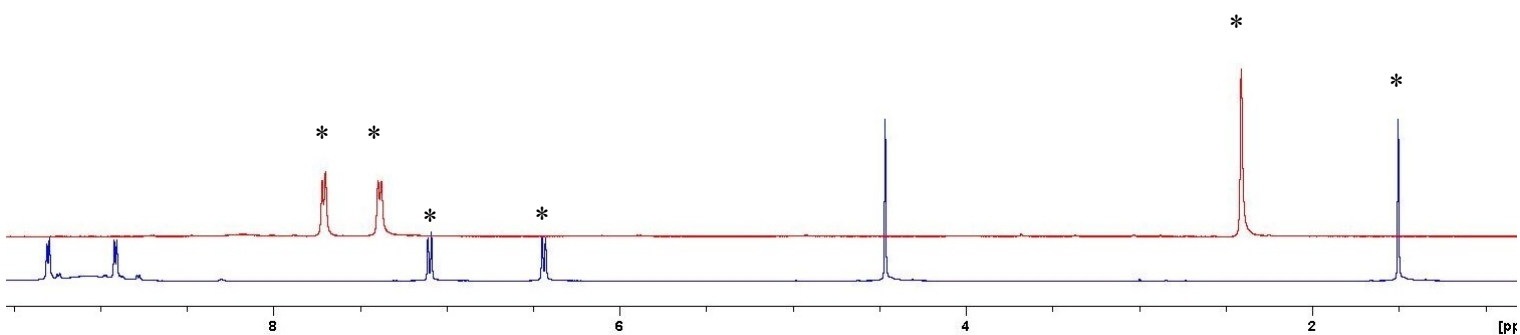

**Figure S9.** <sup>1</sup>H NMR spectrum of *TMPyP* in D<sub>2</sub>O (lower trace), after addition of an excess of HS<sup>-</sup> (upper trace). Peaks denoted with a (\*) correspond to the toluenesulfonate counterion.

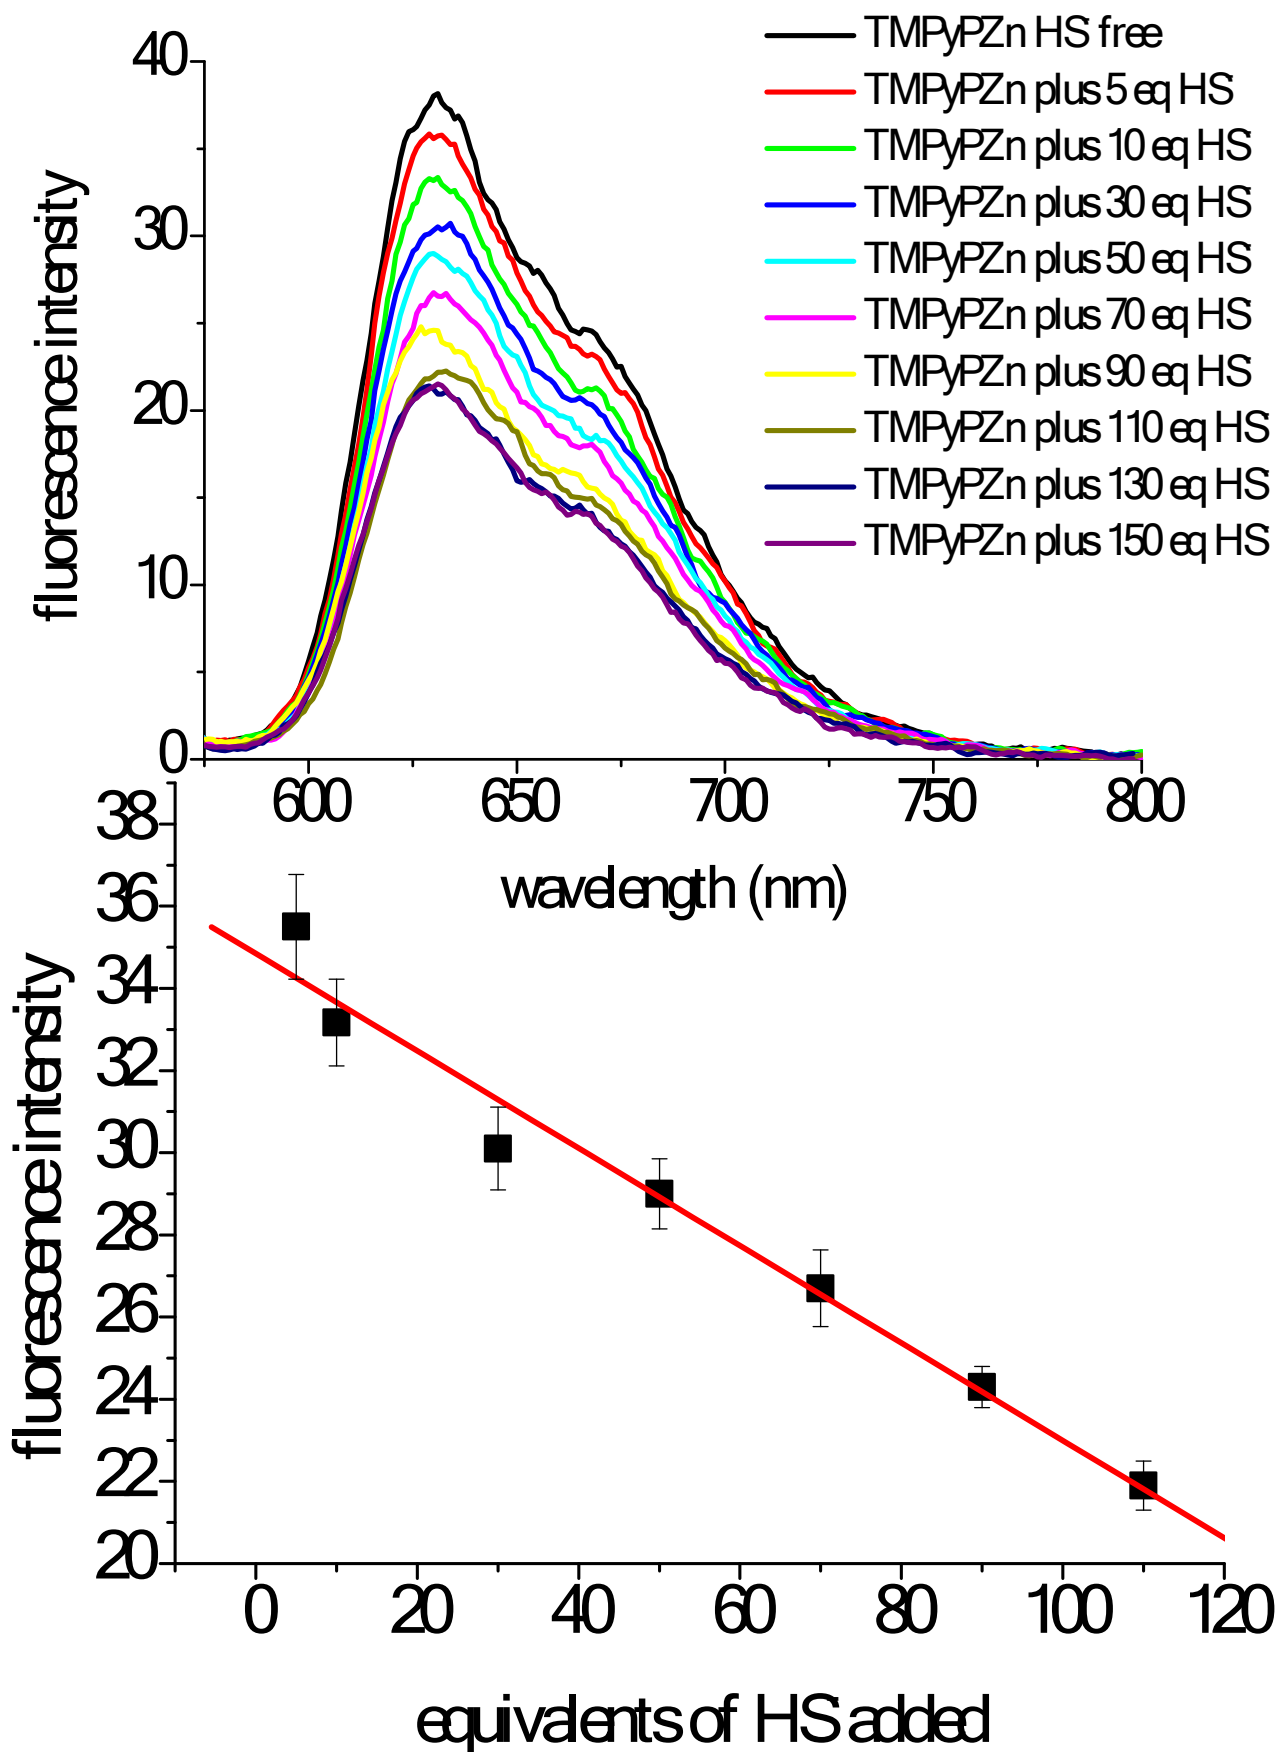

**Figure S10.** (A) Emission spectra of TMPyPZn (exc 563 nm) when titrated with NaSH (rt, hepes buffer 25 mM, pH = 7.4). [TMPyZn] =  $5 \cdot 10^{-6}$  M; end concentration of NaSH varied in the range 25-750  $\mu$ M. (B) Fluorescence intensity of the system versus HS<sup>-</sup> concentration.

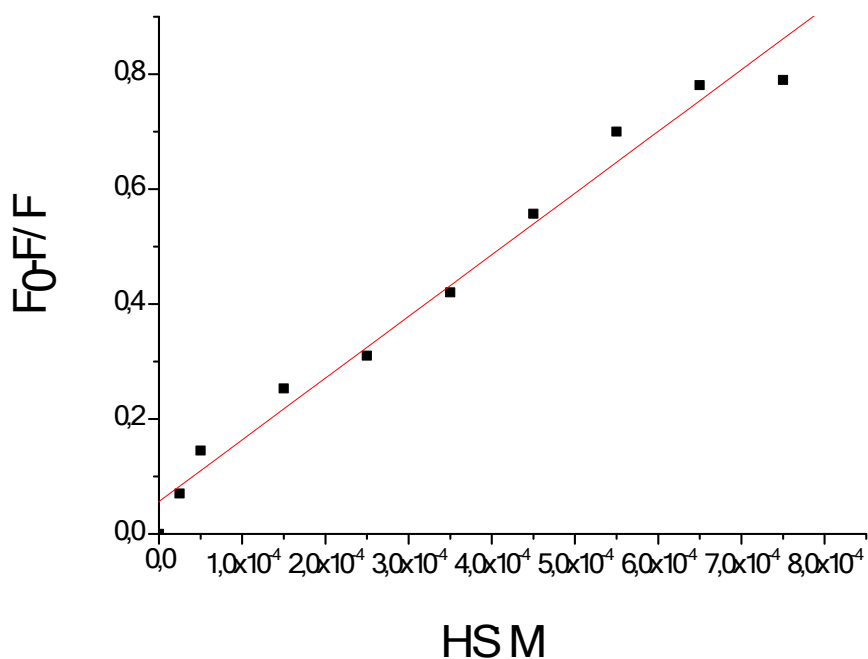

**Figure S11.** Fluorescence titration of TMPyPZn ( $\lambda_{\text{ex}} = 563 \text{ nm}$ ;  $\lambda_{\text{em}} = 630 \text{ nm}$ ) with NaSH (rt, hepes buffer 25 mM, pH = 7.4). [TMPyZn] =  $5 \cdot 10^{-6} \text{ M}$ ; end concentration of NaSH varied in the range 25-750  $\mu\text{M}$ .  $F_0$  is the fluorescence intensity of the solution without  $\text{HS}^-$ . The ratio  $F_0-F/F$  is plotted versus the total  $\text{HS}^-$  concentration. The solid line represents the best fit to a linear fitting with a  $K_b$  of  $1036 \pm 53 \text{ M}^{-1}$ . The equation used for data fitting is :<sup>1</sup>

$$F_0-F/F = K_b [\text{HS}^-]$$

## Generic Display Report (all)

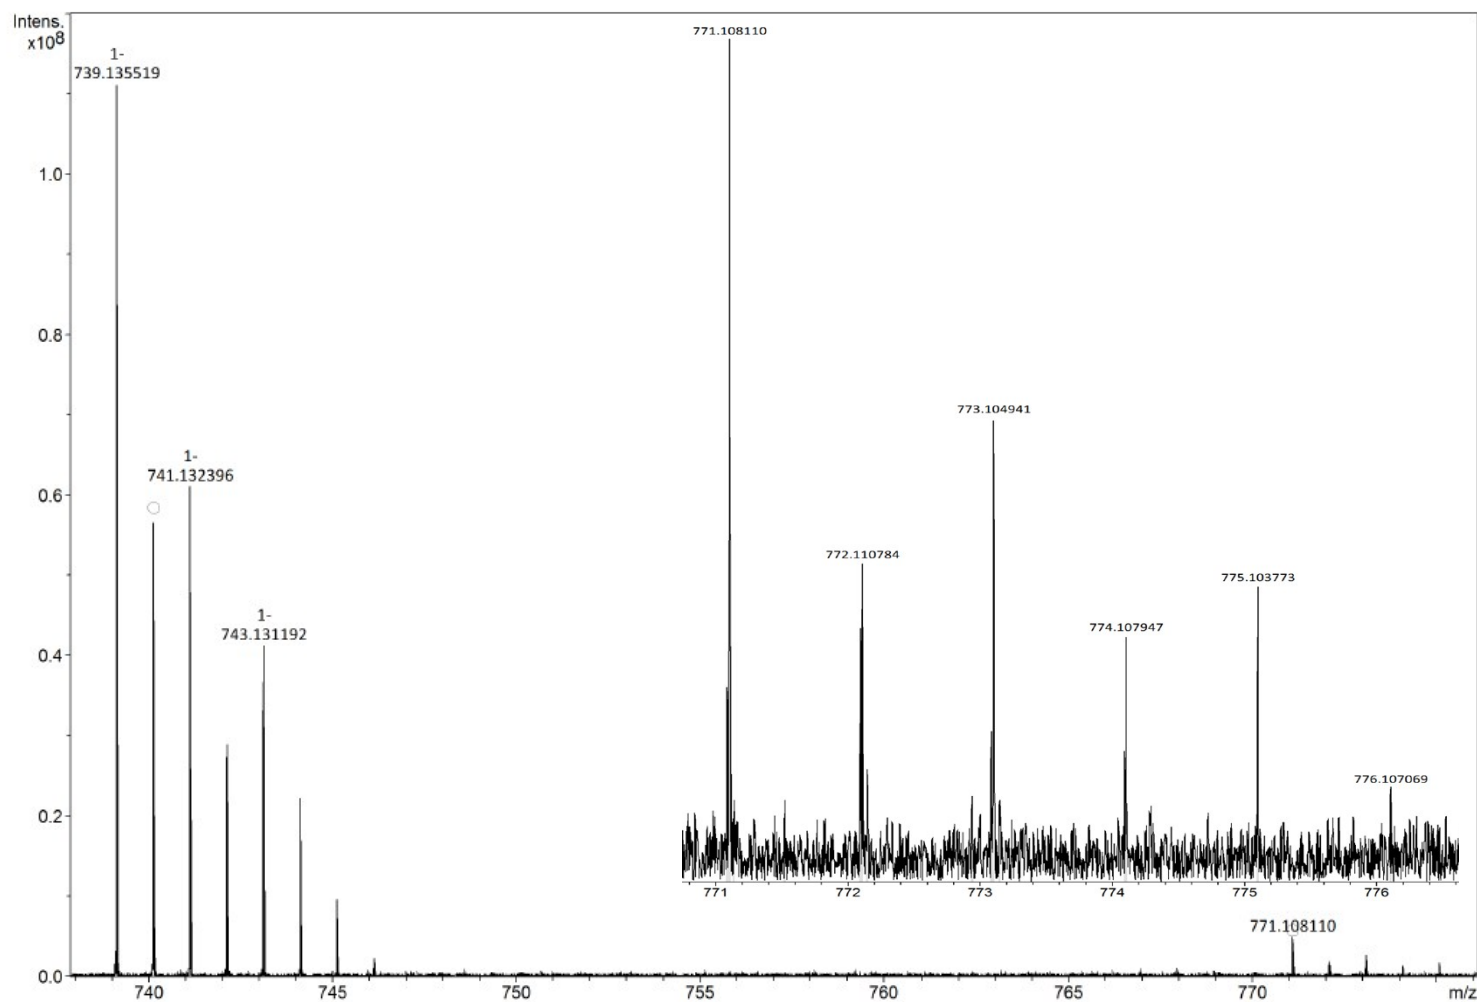

printed: 10/12/2016 5:17:09 PM

by: demo

Page 1 of 1

**Figure S12.** HR MALDI-FT-ICR spectrum of the *TMPyPZn-HS* adduct in water solution (ionizing the sample in the negative ion mode) with the enlargement of the zone in the range 771 – 776 m/z.

## Reference List

- (1) Lakovicz J.R. *Principles of Fluorescence Spectroscopy*; Kluwer Academic/Plenum, New York, Boston, Dordrecht, Moscow: 1996.
